# Supplementary material
Source: PubMed Central journal article supplement (PMC4922128)
Supplement: JCM.00132-16_zjm999095031so1.pdf [file JCM.00132-16_zjm999095031so1.pdf]

## **Supplemental Material**

### **Comparison of culture-based methods to identify colonization with methicillin-resistant and methicillin-susceptible *Staphylococcus aureus* in the context of co-colonization**

Davis, MF; Hu, B; Carroll, K; Bilker, WB; Tolomeo, P; Cluzet, VC; Baron, P; Ferguson, JF; Morris, DO; Rankin, SC; Lautenbach, E; and Nachamkin, I; for the CDC Prevention Epicenters Network

#### **Supplemental methods**

This method comparison was performed in the context of a randomized controlled trial investigating a one-week household-wide decolonization protocol using twice-daily nasal mupirocin and two chlorhexidine body wash events compared to an education control group. There were two decolonization groups, using an identical medication protocol, that differed in terms of the degree of participant contact to reinforce medication adherence. One of the medication groups received daily contact during the one-week period and the other medication group did not receive this contact. *A priori*, randomization to a decolonization arm was expected to impact both index participant and household member MRSA and MSSA prevalence. Hence, results from the enrollment home visit, prior to randomization, and from the three-month home visit, following treatment, were analyzed separately. Test sensitivity for the CHROMagar and broth-enrichment methods was calculated by dividing the number positive for the individual tests by the number positive if either test was positive (1), similar to work we previously have performed (2).

For the broth-enrichment method, multiple colonies were selected on the basis of

morphology on Columbia CNA blood agar and were subcultivated as needed, then transferred to Baird-Parker agar. Baird-Parker agar permits the growth of both coagulase-positive and coagulase-negative *Staphylococcus*; these groups are differentiated on the basis of lecithinase activity. All isolates demonstrating tellurite reduction and lecithinase activity were designated presumptive coagulase-positive staphylococci (CPS). All lecithinase-negative isolates were additionally tube-coagulase tested and any of these that were tube coagulase-positive isolates additionally were designated presumptive CPS. All presumptive CPS were identified to the species level.

### **Supplemental discussion**

Copan E-swabs previously have demonstrated excellent sensitivity and utility for sample collection (3, 4). Similarly, CHROMagar staph aureus and CHROMagar MRSA have been favorably compared to a gold standard of identified blood agar isolates confirmed with Gram stain, catalase test, and latex agglutination for slide coagulase (5). Baird-Parker agar, enriched with ciprofloxacin, previously has been evaluated and determined to have excellent sensitivity as a screening medium for MRSA (6). However, use of Baird-Parker agar to detect *S. aureus* and other CPS from clinical specimens is not common.

The finding of coagulase-negative *Staphylococcus* (CNS) isolates, including *S. epidermidis*, that demonstrated lecithinase activity on Baird-Parker and hence were designated presumptive CPS by the broth-enrichment protocol was unexpected. In a prior study, lecithinase activity was identified using Baird-Parker agar in three (3.4%) of 117 CNS isolated from newborns: two *S. epidermidis* and one *S. haemolyticus* (7). Interestingly, our laboratory previously identified false positives on CHROMagar MRSA associated with presence of CNS species, specifically *S. epidermidis* and *S. warneri* (8).

## Supplemental references

1. **Gordis, L.** 2014. *Epidemiology—Fifth Edition*. Elsevier, Philadelphia.
2. **Iverson, SA, Brazil, AM, Ferguson, JM, Nelson, K, Lautenbach, E, Rankin, SC, Morris, DO, Davis, MF.** 2015. Anatomical patterns of colonization of pets with staphylococcal species in homes of people with methicillin-resistant *Staphylococcus aureus* (MRSA) skin or soft tissue infection (SSTI). *Vet. Microbiol.* **176**:202-208.
3. **Smismans, A, Verhaegen, J, Schuermans, A, Frans, J.** 2009. Evaluation of the Copan ESwab transport system for the detection of methicillin-resistant *Staphylococcus aureus*: a laboratory and clinical study. *Diagn. Microbiol. Infect. Dis.* **65**:108-111.
4. **Van Horn, KG, Audette, CD, Sebeck, D, Tucker, KA.** 2008. Comparison of the Copan ESwab system with two Amies agar swab transport systems for maintenance of microorganism viability. *J. Clin. Microbiol.* **46**:1655-1658.
5. **Tande, D, Garo, B, Ansart, S, Lejeune, B.** 2008. Efficiency of CHROMagar-MRSA in detecting methicillin-resistant *Staphylococcus aureus* in a routine setting. *J. Hosp. Infect.* **70**:388-389.
6. **Bowers, KM, Wren, MW, Shetty, NP.** 2003. Screening for methicillin resistance in *Staphylococcus aureus* and coagulase-negative staphylococci: an evaluation of three selective media and Mastalex-MRSA latex agglutination. *Br. J. Biomed. Sci.* **60**:71-74.
7. **Cunha Mde, L, Rugolo, LM, Lopes, CA.** 2006. Study of virulence factors in coagulase-negative staphylococci isolated from newborns. *Mem. Inst. Oswaldo Cruz.* **101**:661-668.
8. **Pape, J, Wadlin, J, Nachamkin, I.** 2006. Use of BBL CHROMagar MRSA medium for identification of methicillin-resistant *Staphylococcus aureus* directly from blood cultures. *J. Clin. Microbiol.* **44**:2575-2576.
